# Supplementary material
Source: MDPI journal article supplement (https://www.mdpi.com/2673-8783/2/2/5)
Supplement: s1 [file s1]

# Fungal extracellular lipases from coffee plantation environments for the sustainable management of agroindustrial coffee biomass

Randall Syedd-León<sup>1,2</sup>, Frank Solano-Campos<sup>3</sup>, Jorge Campos-Rodríguez<sup>1</sup>, Daniela Pereira-Arce<sup>1</sup>, Luis Roberto Vilegas-Peñaranda<sup>1,4</sup>, and Manuel Sandoval-Barrantes<sup>1,\*</sup>

<sup>1</sup> Biorefinery Research Laboratory (LIB), Chemistry School, Universidad Nacional. Heredia, P.O. Box 86-3000, Costa Rica.

<sup>2</sup> Natural and Exact Sciences School, Universidad Estatal a Distancia. Mercedes de Montes de Oca, 11503 Costa Rica.

<sup>3</sup> Plant Biotechnology Laboratory, Biological Sciences School, Universidad Nacional, Heredia, P.O. Box 86-3000 Costa Rica.

<sup>4</sup> Teaching, Research and Production support laboratory (LADIP), Chemistry School, Universidad Nacional. Heredia, P.O. Box 86-3000, Costa Rica.

\* Correspondence: Manuel Sandoval-Barrantes. Email: manuel.sandoval.barrantes@una.ac.cr)

## SUPPLEMENTARY INFORMATION

### SUMMARY OF CONTENTS

**Table S1.** Degenerate primers designed for Fungal lipases

**Table S2.** ITS-based DNA barcoding of fungal isolates

**Table S3.** Predicted proteins alignments to the homologous families in the LED and NCBI nr databases.

**Table S1.** Degenerate primers designed for Fungal lipases

| Genus              | Primer ID     | Sequence (5'-3')               |
|--------------------|---------------|--------------------------------|
| <i>Apergillus</i>  | As_F1         | ATGTTCTCTGGACGGBTTGG           |
|                    | As_R1         | CTATAGCAGRCASTCKGR             |
|                    | Pc_AspF_LipF  | ATARGAAAGGATAAAGCAA-<br>GATGGT |
|                    | Pc_AspF_LipR  | ATACACTAYTAGCACCCAACCTCAA      |
|                    | Pc_AspF_LipF3 | AGAGGWCCTGGMTTCTACCACA         |
|                    | Pc_AspF_LipR3 | AGAGAKGTCACCATGGAGTCTC         |
|                    |               |                                |
| <i>Fusarium</i>    | Fu_F1         | ATGCTTCTTCTACCACTYCTC          |
|                    | Fu_R1         | TTAAGWGC GGCGCTGGTTA           |
|                    | Pc_Fu_F1      | TCTTCTACCACTYCTCTCRGCC         |
|                    | Pc_Fu_R1      | GCGGGCCTGGTTATTCTT             |
|                    | Pc_Fu_F2      | GCCCTGTAGCTCTCGAYGAC           |
|                    | Pc_Fu_R2      | TMACATACTCCTTATCCATCTGGA       |
|                    | Fu_So_F1      | ATGATGCTCATCCTATCTATTC         |
|                    | Fu_So_R1      | CTAAGTCATCTGCTTAACAAAT         |
|                    |               |                                |
| <i>Penicillium</i> | Pe_F1         | ATGTTGTTCAACTRCCARTCTTTRC      |
|                    | Pe_R1         | GCCACARCCAGCAGTAAGC            |
|                    | Pc_Pe_F2      | CTKTCTGCACCTRTTTTGGAG          |
|                    | Pc_Pe_R1      | AAGCTTGMGAWGTGACCG             |
|                    |               |                                |
| <i>Mucor</i>       | Mu_F1         | GGTSTCWTTACWWCYATCAC           |
|                    | Mu_R1         | TTAAAGRCAAAGWCCTTSATTRAT       |

**Table S2.** ITS-based DNA barcoding of fungal isolates

|        | IDTAXA UNITE<br>v2020<br>February2020 |            | IDTAXA Warcup_v2<br>March 2018      |            | RDP UNITE<br>Fungal ITS<br>07/04/2014                   |            | RDP Warcup 2                             |            | BLAST NCBI<br>Internal transcribed spacer region (ITS) |                             |            |                                                     |                                  |
|--------|---------------------------------------|------------|-------------------------------------|------------|---------------------------------------------------------|------------|------------------------------------------|------------|--------------------------------------------------------|-----------------------------|------------|-----------------------------------------------------|----------------------------------|
|        | Assignment                            | Confidence | Assignment                          | Confidence | Assignment                                              | Confidence | Assignment                               | Confidence | Bit-<br>score                                          | Pairwise<br>Identity<br>(%) | E<br>value | Accession                                           | Genus                            |
| C-1    | <i>Aspergillus westerdijkiae</i>      | 72%        | <i>Aspergillus</i>                  | 83%        | <i>Aspergillus ochraceus</i>   SH231999.06FU            | 100%       | <i>Aspergillus</i>                       | 100%       | 966.918                                                | 99.1                        | 0.0        | NR_135389                                           | <i>Aspergillus westerdijkiae</i> |
| 12-C   | <i>Rhizopus arrhizus</i>              | 90%        | <i>Rhizopus</i>                     | 90%        | <i>Rhizopus arrhizus</i> var._arr-hizus   SH225968.06FU | 100%       | <i>Rhizopus</i>                          | 100%       | 1055.56                                                | 99.0                        | 0.0        | NR_103595                                           | <i>Rhizopus arrhizus</i>         |
| 2-5E   | unclassified_<br><i>Nectriaceae</i>   | 98%        | <i>Gibberella</i>                   | 90%        | <i>Fusarium oxysporum</i>   SH217297.06FU               | 100%       | <i>Fusarium oxysporum</i>                | 80%        | 911.519                                                | 99.0                        | 0.0        | NR_120263                                           | <i>Fusarium circinatum</i>       |
| C-2    | <i>Penicillium</i>                    | 99%        | <i>Eupenicillium</i>                | 86%        | <i>Penicillium chrysogenum</i>   SH214177.06FU          | 100%       | <i>Eupenicillium</i>                     | 100%       | 1009.39                                                | 100.0                       | 0.0        | NR_111815                                           | <i>Penicillium rubens</i>        |
| 2-1B   | <i>Fusarium</i>                       | 69%        | <i>Gibberella</i>                   | 90%        | <i>Fusarium oxysporum</i>   SH217297.06FU               | 100%       | <i>Fusarium oxysporum</i>                | 86%        | 911.519                                                | 99.2                        | 0.0        | NR_152941                                           | <i>Fusarium inflexum</i>         |
| 2-8A   | <i>Penicillium</i>                    | 96%        | <i>Eupenicillium</i>                | 84%        | <i>Penicillium</i>                                      | 100%       | <i>Eupenicillium</i>                     | 100%       | 1016.78                                                | 100.0                       | 0.0        | NR_077153                                           | <i>Penicillium crustosum</i>     |
| 2-5B-1 | <i>Hypocreales_sp</i>                 | 90%        | unclassified_<br><i>Nectriaceae</i> | 77%        | <i>Ascomycota</i>                                       | 100%       | <i>Nectria haematococca</i> mpVI         | 85%        | 915.212                                                | 99.0                        | 0.0        | NR_164415                                           | <i>Fusarium perseae</i>          |
| 2-5A-1 | <i>Fusarium</i>                       | 72%        | unclassified_<br><i>Nectriaceae</i> | 80%        | <i>Ascomycota</i> sp.<br>  SH233666.06FU                | 100%       | <i>Fusarium oxysporum</i><br>f sp psidii | 81%        | 974.305                                                | 100.0                       | 0.0        | NR_154227                                           | <i>Neocosmospora rubicola</i>    |
| SL14D  | <i>Aspergillus</i>                    | 82%        | <i>Aspergillus</i>                  | 90%        | <i>Ascomycota</i>                                       | 100%       | <i>Aspergillus</i>                       | 100%       | 1040.78                                                | 100.0                       | 0.0        | NR_163668,<br>NR_137513,<br>NR_111348,<br>NR_077143 | <i>Aspergillus</i> sp.           |
| 2-2B   | <i>Papiliotrema flavescens</i>        | 82%        | <i>Cryptococcus</i>                 | 79%        | <i>Tremellomyces_sp</i>   SH219359.06FU                 | 100%       | <i>Cryptococcus flavescens</i>           | 100%       | 887.512                                                | 99.2                        | 0.0        | NR_130696                                           | <i>Papiliotrema flavescens</i>   |
| 2-5B-2 | <i>Aspergillus</i>                    | 91%        | <i>Aspergillus</i>                  | 89%        | <i>Ascomycota</i>                                       | 100%       | <i>Aspergillus</i>                       | 100%       | 1038.94                                                | 99.8                        | 0.0        | NR_163668,<br>NR_137513,                            | <i>Aspergillus</i> sp.           |

|        |                                    |     |                              |     |                                                 |      |                                     |      |         |       |          |                          |                                      |
|--------|------------------------------------|-----|------------------------------|-----|-------------------------------------------------|------|-------------------------------------|------|---------|-------|----------|--------------------------|--------------------------------------|
|        |                                    |     |                              |     |                                                 |      |                                     |      |         |       |          | NR_111348,<br>NR_077143  |                                      |
| 2-1A   | <i>Fusarium</i>                    | 76% | <i>Gibberella</i>            | 86% | <i>Fusarium proliferatum</i>   SH217299.06FU    | 93%  | <i>Fusarium annulatum</i>           | 93%  | 961.378 | 99.8  | 0.0      | NR_111889                | <i>Fusarium fujikuroi</i>            |
| 2-5G   | <i>Absidia_sp</i>                  | 67% | unclassified_Root            | 26% | <i>Absidia</i>                                  | 100% | <i>Mucorales</i>                    | 96%  | 348.29  | 91.5  | 5.23e-96 | NR_154704,<br>NR_103626  | <i>Absidia sp.</i>                   |
| 2-2A   | <i>Cunninghamella echinulata</i>   | 88% | unclassified_Root            | 19% | <i>Cunninghamella</i>                           | 100% | <i>Fungi</i>                        | 100% | 322.437 | 86.2  | 5.55e-88 | NR_168760                | <i>Cunninghamella gigacellularis</i> |
| 2-6B   | Unclassified<br><i>Nectriaceae</i> | 97% | <i>Gibberella</i>            | 84% | <i>Fusarium oxysporum</i>   SH217297.06FU       | 96%  | <i>Gibberella</i>                   | 100% | 920.752 | 98.8  | 0.0      | NR_120263                | <i>Fusarium circinatum</i>           |
| 2-5F   | <i>Hypocreales_sp</i>              | 90% | unclassified_Nectriaceae     | 77% | <i>Ascomycota</i>                               | 100% | <i>Nectria haematococca</i><br>mpVI | 85%  | 915.212 | 99.0  | 0.0      | NR_164415                | <i>Fusarium perseae</i>              |
| 2-9A-1 | <i>Penicillium</i>                 | 98% | <i>Eupenicillium</i>         | 77% | <i>Penicillium</i>                              | 100% | <i>Eupenicillium</i>                | 100% | 1014.93 | 99.8  | 0.0      | NR_077153                | <i>Penicillium crustosum</i>         |
| 2-9B   | <i>Penicillium</i>                 | 96% | <i>Eupenicillium</i>         | 78% | <i>Penicillium</i>                              | 100% | <i>Eupenicillium</i>                | 100% | 1016.78 | 99.8  | 0.0      | NR_077153                | <i>Penicillium crustosum</i>         |
| 2-6    | <i>Mucor nidicola</i>              | 92% | <i>Mucor sp</i><br>JJP_2009a | 84% | <i>Mucor sp.</i> JJP<br>2009a   SH202371.06FU   | 100% | <i>Mucor sp</i> JJP_2009a           | 100% | 776.713 | 90.4  | 0.0      | NR_172288                | <i>Mucor irregularis</i>             |
| 2-9A-2 | <i>Penicillium</i>                 | 98% | <i>Eupenicillium</i>         | 84% | <i>Penicillium polonicum</i>   SH231333.06FU    | 82%  | <i>Eupenicillium</i>                | 100% | 1011.24 | 100.0 | 0.0      | NR_077153                | <i>Penicillium crustosum</i>         |
| 2-5A-2 | <i>Penicillium</i>                 | 76% | <i>Eupenicillium</i>         | 73% | <i>Penicillium</i>                              | 96%  | <i>Eupenicillium</i>                | 96%  | 909.672 | 97.0  | 0.0      | NR_077153                | <i>Penicillium crustosum</i>         |
| 2-2    | <i>Mucor nidicola</i>              | 99% | unclassified_Root            | 68% | <i>Mucor sp.</i><br>IN-Bio2559C   SH202378.06FU | 100% | <i>Mucor sp</i> JJP_2009a           | 99%  | 776.713 | 92.5  | 0.0      | NR_111660                | <i>Mucor fusiformis</i>              |
| 2-8D   | <i>Penicillium</i>                 | 96% | <i>Eupenicillium</i>         | 93% | <i>Penicillium</i>                              | 100% | <i>Eupenicillium</i>                | 100% | 955.838 | 99.8  | 0.0      | NR_077153                | <i>Penicillium crustosum</i>         |
| 2-7    | <i>Mucor nidicola</i>              | 69% | <i>Mucor sp</i><br>JJP_2009a | 76% | <i>Mucor sp.</i> JJP<br>2009a   SH202371.06FU   | 93%  | <i>Mucor sp</i> JJP_2009a           | 100% | 765.633 | 90.1  | 0.0      | NR_172288                | <i>Mucor irregularis</i>             |
| 2-4B   | <i>Penicillium</i>                 | 98% | <i>Eupenicillium</i>         | 84% | <i>Penicillium polonicum</i><br>  SH231333.06FU | 82%  | <i>Eupenicillium</i>                | 100% | 1011.24 | 100.0 | 0.0      | NR_077153                | <i>Penicillium crustosum</i>         |
| 14     | <i>Aspergillus westerdijkiae</i>   | 62% | <i>Aspergillus</i>           | 81% | <i>Aspergillus ochraceus</i><br>  SH231999.06FU | 100% | <i>Aspergillus</i>                  | 100% | 963.225 | 98.9  | 0.0      | NR_135389                | <i>Aspergillus westerdijkiae</i>     |
| 19     | <i>Fusarium</i>                    | 87% | <i>Gibberella</i>            | 87% | <i>Fusarium proliferatum</i><br>  SH217299.06FU | 90%  | <i>Fusarium annulatum</i>           | 95%  | 953.992 | 99.8  | 0.0      | NR_111889                | <i>Fusarium fujikuroi</i>            |
| 20     | <i>Aspergillus</i>                 | 82% | <i>Aspergillus</i>           | 91% | <i>Ascomycota</i>                               | 100% | <i>Aspergillus</i>                  | 100% | 1035.24 | 100.0 | 0.0      | NR_163668,<br>NR_137513, | <i>Aspergillus sp.</i>               |

|        |                                   |     |                             |     |                                                 |      |                                  |      |         |       |     |                                                     |                                   |
|--------|-----------------------------------|-----|-----------------------------|-----|-------------------------------------------------|------|----------------------------------|------|---------|-------|-----|-----------------------------------------------------|-----------------------------------|
|        |                                   |     |                             |     |                                                 |      |                                  |      |         |       |     | NR_111348,<br>NR_077143                             |                                   |
| 22     | <i>Meyerozyma</i>                 | 97% | <i>Meyerozyma</i>           | 87% | <i>Candida smithsonii</i><br> SH216776.06FU     | 100% | <i>Meyerozyma guilliermondii</i> | 94%  | 1033.4  | 99.6  | 0.0 | NR_111247                                           | <i>Meyerozyma guilliermondii</i>  |
| 23     | <i>Metarhizium robertsii</i>      | 66% | <i>Metacordyceps</i>        | 80% | <i>Metarhizium pinghaense</i><br> SH201724.06FU | 100% | <i>Metacordyceps</i>             | 100% | 942.912 | 99.4  | 0.0 | NR_132011                                           | <i>Metarhizium robertsii</i>      |
| 24     | <i>Fusarium</i>                   | 83% | <i>Gibberella</i>           | 86% | <i>Fusarium proliferatum</i><br> SH217299.06FU  | 95%  | <i>Fusarium annulatum</i>        | 88%  | 948.452 | 99.6  | 0.0 | NR_111889                                           | <i>Fusarium fujikuroi</i>         |
| 30     | <i>Aspergillus puniceus</i>       | 96% | <i>Aspergillus puniceus</i> | 87% | <i>Aspergillus monodii</i><br> SH227456.06FU    | 100% | <i>Aspergillus puniceus</i>      | 100% | 1016.78 | 100.0 | 0.0 | NR_103579                                           | <i>Aspergillus puniceus</i>       |
| 31     | <i>Aspergillus</i>                | 82% | <i>Aspergillus</i>          | 91% | <i>Ascomycota</i>                               | 100% | <i>Aspergillus</i>               | 100% | 1035.24 | 100.0 | 0.0 | NR_163668,<br>NR_137513,<br>NR_111348,<br>NR_077143 | <i>Aspergillus sp.</i>            |
| EN-13  | <i>Trichoderma</i>                | 97% | <i>Hypocrea</i>             | 90% | <i>Ascomycota sp.</i><br> SH211670.06FU         | 85%  | <i>Hypocrea lixii</i>            | 100% | 1066.64 | 99.8  | 0.0 | NR_137297                                           | <i>Trichoderma simmonsii</i>      |
| EN-15B | <i>Aspergillus</i>                | 88% | <i>Aspergillus</i>          | 91% | <i>Ascomycota</i>                               | 100% | <i>Aspergillus</i>               | 100% | 1026.01 | 99.6  | 0.0 | NR_163668,<br>NR_137513,<br>NR_111348,<br>NR_077143 | <i>Aspergillus sp.</i>            |
| EN-16B | <i>Aspergillus</i>                | 82% | <i>Aspergillus</i>          | 91% | <i>Ascomycota</i>                               | 100% | <i>Aspergillus</i>               | 100% | 1035.24 | 100.0 | 0.0 | NR_163668,<br>NR_137513,<br>NR_111348,<br>NR_077143 | <i>Aspergillus sp.</i>            |
| EN-19  | <i>Hypocreales sp</i>             | 88% | unclassified_Nectria-ceae   | 74% | <i>Ascomycota</i>                               | 100% | <i>Nectria haematococca mpVI</i> | 87%  | 904.132 | 98.6  | 0.0 | NR_164415                                           | <i>Fusarium perseae</i>           |
| EN-20A | <i>Penicillium</i>                | 94% | <i>Eupenicillium</i>        | 78% | <i>Penicillium</i>                              | 99%  | <i>Eupenicillium</i>             | 100% | 996.464 | 99.5  | 0.0 | NR_077153                                           | <i>Penicillium crustosum</i>      |
| AW-2   | <i>Fusarium</i>                   | 83% | <i>Gibberella</i>           | 86% | <i>Fusarium proliferatum</i><br> SH217299.06FU  | 95%  | <i>Fusarium annulatum</i>        | 88%  | 948.452 | 99.6  | 0.0 | NR_111889                                           | <i>Fusarium fujikuroi</i>         |
| AW-301 | <i>Aspergillus westerdijikiae</i> | 68% | <i>Aspergillus</i>          | 83% | <i>Aspergillus ochraceus</i><br> SH231999.06FU  | 100% | <i>Aspergillus</i>               | 100% | 963.225 | 98.9  | 0.0 | NR_135389                                           | <i>Aspergillus westerdijikiae</i> |

**Table S3.** Predicted proteins alignments to the homologous families in the LED and NCBI nr databases.

| Lipase | Isolate | Protein sequence producing significant alignment (LED) |              |         | Protein sequence producing significant alignment (NCBI nr) |           |         | Max Ident (%) |
|--------|---------|--------------------------------------------------------|--------------|---------|------------------------------------------------------------|-----------|---------|---------------|
|        |         |                                                        | Score (bits) | E value |                                                            | Max score | E value |               |
| 1      | SL14D   | abH23.01   triacylglycerol lipase                      | 579          | 1e-166  | alpha/beta-hydrolase, XP_025452468.1                       | 582       | 0.0     | 100           |
| 2      | 2-1B    | abH23.01   lipase                                      | 681          | 0.0     | lipase, ABR12479.1                                         | 681       | 0.0     | 99            |
| 3      | 2-5E    | abH23.01   lipase                                      | 673          | 0.0     | hypothetical protein FOZG_04142, EWZ48645.1                | 674       | 0.0     | 100           |
| 4      | 2-5B    | abH23.01   lipase                                      | 599          | 1e-172  | probable triacylglycerol lipase precursor, XP_023428998.1  | 636       | 0.0     | 100           |
| 5      | 2-5F    | abH23.01   lipase                                      | 634          | 0.0     | probable triacylglycerol lipase precursor, XP_023428998.1  | 671       | 0.0     | 100           |
| 6      | C-2     | abH23.01   lipase                                      | 461          | 1e-130  | Pc13g14030, XP_002559811.1                                 | 545       | 0.0     | 100           |
| 7      | 2-8A    | abH23.01   lipase                                      | 495          | 1e-141  | alkaline lipase, AAF82375.1                                | 495       | 3e-176  | 100           |
| 8      | 2-4B    | abH23.01   lipase                                      | 493          | 1e-140  | alkaline lipase, AAF82375.1                                | 493       | 4e-175  | 100           |
| 9      | 2-9A    | abH23.01   lipase                                      | 489          | 1e-139  | alkaline lipase, AAF82375.1                                | 489       | 8e-174  | 100           |
| 10     | C-1     | abH23.02   lipase                                      | 170          | 1e-42   | extracellular triacylglycerol lipase, XP_024702282.1       | 589       | 0.0     | 78            |
| 11     | AW-301  | abH23.01   hypothetical protein                        | 383          | 1e-107  | alpha/beta-hydrolase, XP_024707445.1                       | 449       | 1e-157  | 86            |
| 12     | 2-5A    | abH23.01   lipase                                      | 647          | 0.0     | lipase, AAB34680.1                                         | 647       | 0.0     | 97            |
| 13     | EN-19   | abH23.01   lipase                                      | 617          | 1e-177  | uncharacterized protein, XP_003040342.1                    | 618       | 0.0     | 96            |
| 14     | 2-6     | abH23.01   lipase                                      | 494          | 1e-140  | lipase, AGV00787.1                                         | 620       | 0.0     | 84            |
